# Supplementary material for: Transmembrane 29 (Tmem29), a Newly Identified Molecule Showed Downregulation in Hypoxic-Ischemic Brain Damage
Source: MDPI journal article supplement (doi:10.3390/neurosci3010003), 2022-01-01
Supplement: s1 [file s1]

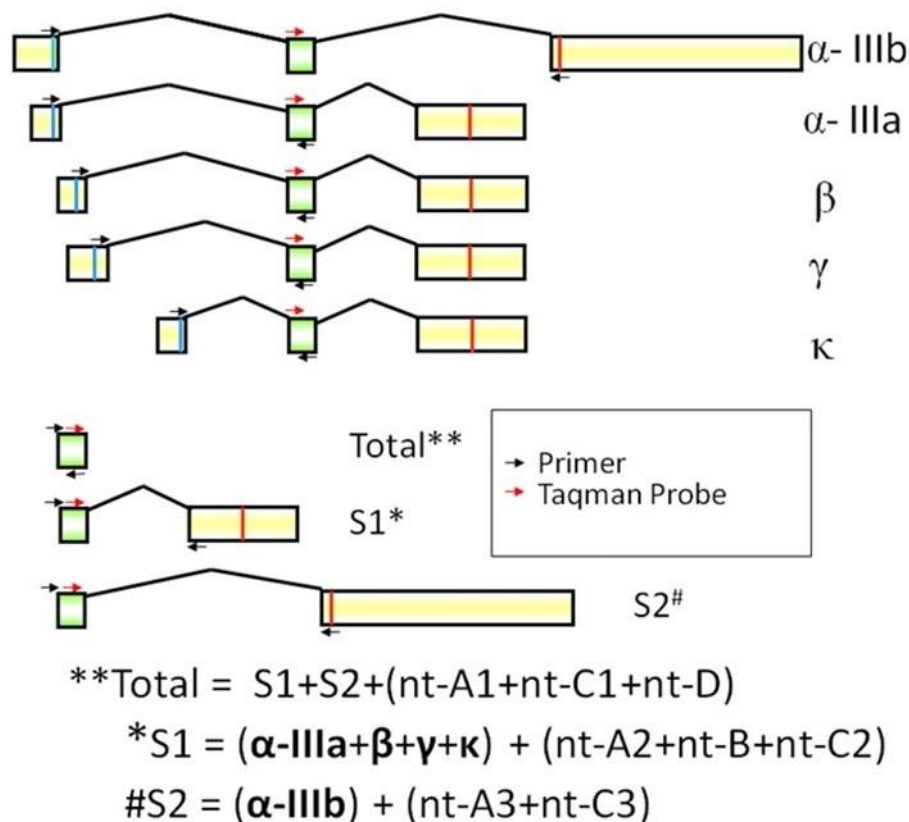

**Figure S1.** Schematic diagram of primers used in absolute quantification real-time PCR. Black arrows indicated the relative positions of the primers and red arrows indicated the position of the Taqman® probe which was targeted to different HID-1 transcripts. Blue lines showed the relative position of the start codon and red lines showed the stop codon which is predicted from the bioinformatics approach as a sense protein can be translated with this region of the transcripts.

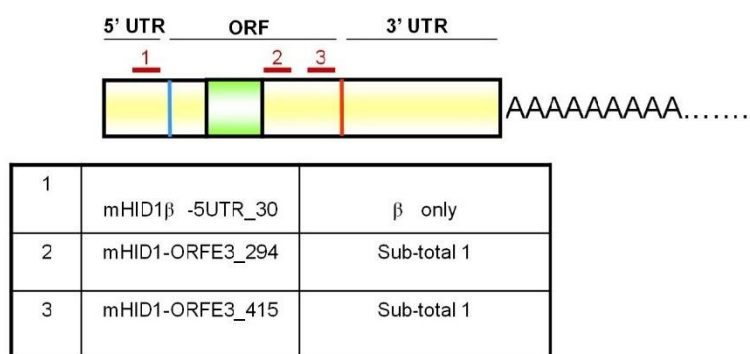

**Figure S2.** Schematics diagram of the relative position of siRNA on HID-1β transcripts. Red bars indicated the position of siRNA.

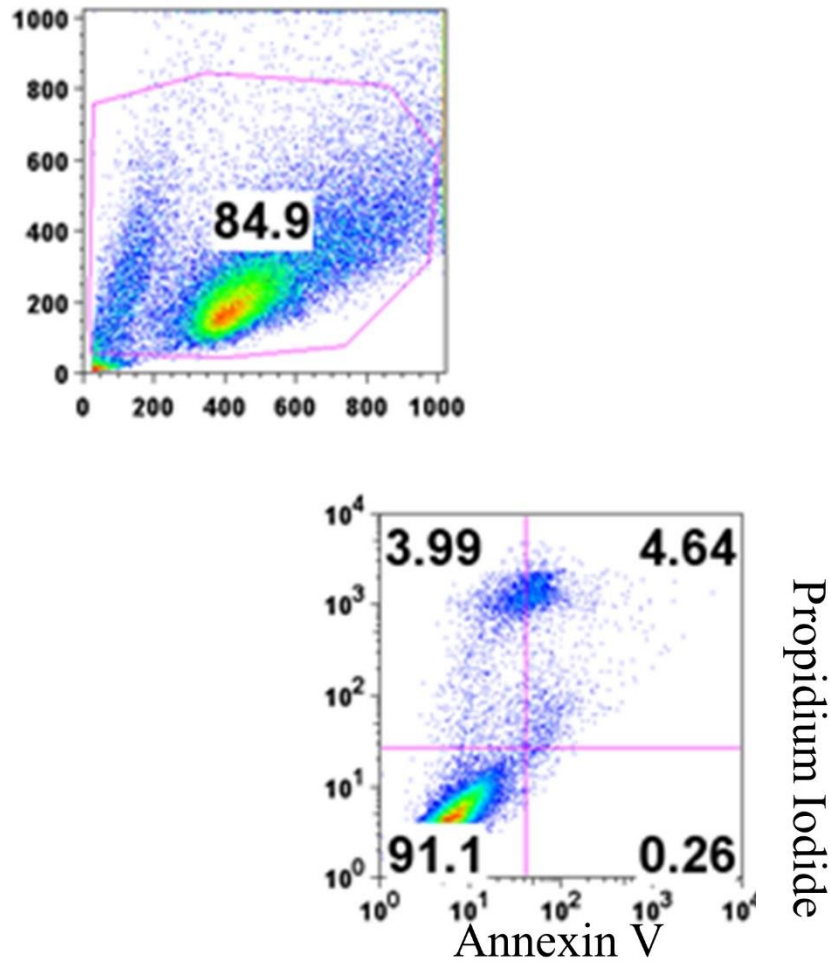

**Figure S3.** Gating Strategy for apoptotic cells determination by OGD in Neuro2a cells.

**Table S1.** Primers for absolute quantification real-time PCR.

| Primer               | Sequence (5' to 3')                  | Size (bp) |
|----------------------|--------------------------------------|-----------|
| HID-1 $\alpha$ -IIIa | Sense - tgaaccagccaatccttaacctaa     | 171       |
|                      | Antisense - ttctttcattatcactgcttg    |           |
| HID-1 $\alpha$ -IIIb | Sense - tgaaccagccaatccttaacctaa     | 193       |
|                      | Antisense - ctaggcgagagctaggaggga    |           |
| HID-1 $\beta$        | Sense - gtgcggtgtgtgttcat            | 178       |
|                      | Antisense - tccttctaatacctcttcgaacga |           |
| HID-1 $\gamma$       | Sense - cccttctcttctgcctatgtgt       | 105       |
|                      | Antisense - tccttctaatacctcttcgaacga |           |
| HID-1 $\kappa$       | Sense - actcctgtgacgggccttgaa        | 132       |
|                      | Antisense - tccttctaatacctcttcgaacga |           |
| HID-S1               | Sense - gaaaagaagaccagatgataat       | 125       |
|                      | Antisense - tccttctaatacctcttcgaacga |           |
| HID-S2               | Sense - gaaaagaagaccagatgataat       | 144       |
|                      | Antisense - ctaggcgagagctaggaggga    |           |
| HID-E2 (Total)       | Sense - gaaaagaagaccagatgataat       | 72        |
|                      | Antisense - tccttctaatacctcttcgaacga |           |
